# Supplementary material for: A comparison of survey method efficiencies for estimating densities of zebra mussels ( Dreissena polymorpha )
Source: PeerJ journal article supplement (doi:10.7717/peerj.15528), 2023-07-10
Supplement: FigureS1.pdf [file FigureS1.pdf]

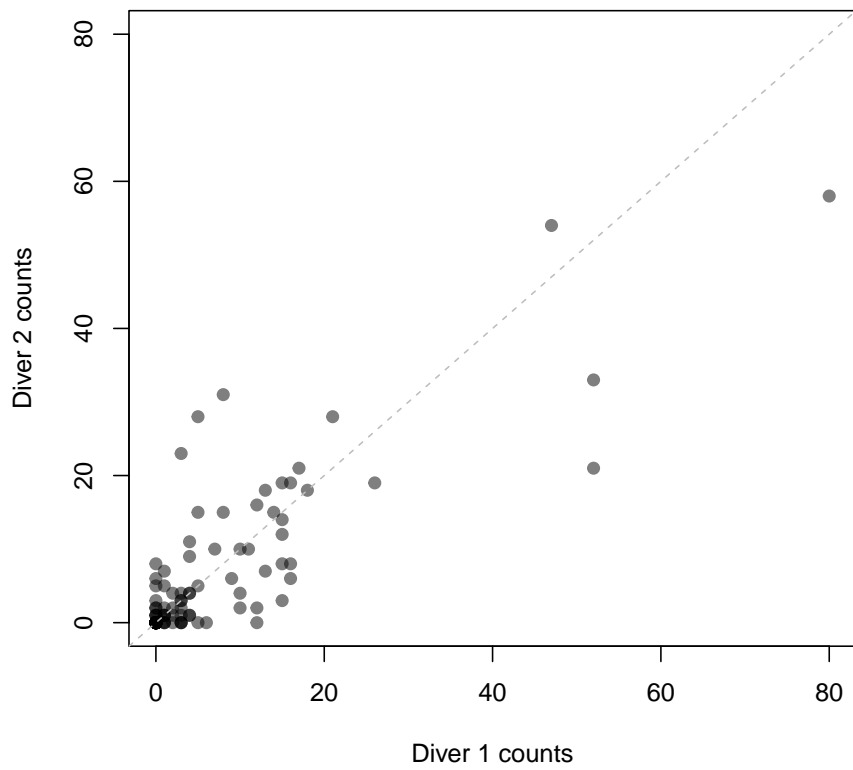

Figure S1: Counts from Diver 1 and Diver 2 on repeated quadrats in 11 transects from Little Birch Lake. The dotted line represents the ideal case where no observational error is present in the counts.
