# Supplementary material for: A comparison of survey method efficiencies for estimating densities of zebra mussels (Dreissena polymorpha)
Source: PubMed Central journal article supplement (PMC10340101; doi:10.7717/peerj.15528), 2023-07-10
Supplement: peerj-11-15528-s002.pdf [file peerj-11-15528-s002.pdf]

Table S2: Estimated median transect survey time (in hours) and the associated standard errors.

| Lake              | Design   | Median | Standard error |
|-------------------|----------|--------|----------------|
|                   | Distance | 0.40   | 0.04           |
| Lake Burgan       | Removal  | 0.36   | 0.03           |
|                   | Quadrat  | 0.33   | 0.03           |
|                   | Distance | 1.15   | 0.20           |
| Little Birch Lake | Removal  | 0.66   | 0.15           |
|                   | Quadrat  | 0.59   | 0.10           |
|                   | Distance | 0.25   | 0.02           |
| Lake Florida      | Removal  | 0.25   | 0.03           |
|                   | Quadrat  | 0.29   | 0.03           |
