# Supplementary material for: A comparison of survey method efficiencies for estimating densities of zebra mussels ( Dreissena polymorpha )
Source: PeerJ journal article supplement (doi:10.7717/peerj.15528), 2023-07-10
Supplement: TableS1.pdf [file TableS1.pdf]

Table S1: Average counts in 30 timed searches (15 minutes each) for six lakes surveyed in Minnesota. Two observers conducted the surveys and visited 15 transects along the perimeter of the lake. Survey results were used to identify three early invaded lakes for subsequent surveys that covered a range of population densities.

| Lake surveyed     | Average counts |
|-------------------|----------------|
| Lake Florida      | 0.3            |
| Lake Burgan       | 1.7            |
| Little Birch Lake | 55.1           |
| East Lake Sylvia  | 97.7           |
| Lake Sylvia       | 119.5          |
| Christmas Lake    | Uncountable    |
